# Supplementary material for: GLUT5-mediated fructose utilization drives lung cancer growth by stimulating fatty acid synthesis and AMPK/mTORC1 signaling
Source: JCI journal article supplement (doi:10.1172/jci.insight.131596), 2020-02-12

# Supplemental Information

## Supplemental experimental procedures

### Fructose and glucose uptake analysis of *in vitro* studies

Lung cancer (LC) cell lines were cultured in glucose-free DMEM with 10% dialyzed fetal bovine serum (dFBS) and distinct concentrations of glucose. Spent media were collected for fructose uptake examination under distinct glucose conditions. Additionally, we investigated the impact of *SLC2A5* ablation or GLUT5 overexpression on fructose uptake and glucose uptake of LC cell lines. The commercial kits, fructose colorimetric/fluorometric assay kit (Sigma) and glucose (HK) assay kit (Sigma), were used following the manufacturer's protocol.

### Cell proliferation, cell viability, cell apoptosis and cell colony formation

Cells were cultured in medium prepared with glucose-free DMEM, 10% dFBS and sugar(s) indicated in figures or figure legends. Cell proliferation and cell viability were analyzed using a Cell Counting Kit-8 (CCK-8, Dojindo Laboratories) according to the manufacturer's recommendation. Cell apoptosis was measured using a FITC Annexin V Apoptosis Detection Kit (BD) following the manufacturer's protocol.

### Immunohistochemistry (IHC) staining and histologic evaluation

Paired adjacent normal lung tissues and tumorous lung tissues of LC patients with adenocarcinoma (ADC) or squamous cell carcinoma (SCC) were harvested to construct tissue microarray according to previous description (1). Tissue microarray was stained with antibody against GLUT5, Ki67, CyclinD1, cleaved-Caspase 3, CD31 or nonspecific IgG as a negative control. The tissue sections were quantitatively scored based on the percentage of positive cells and staining intensity as described previously (2). The mean percentage of positive cells were computed in five areas of a given sample at a magnification of  $\times 400$  and scored from 0 – 100%. The staining intensity was scored as 0 for negative, 1 for weak, 2 for moderate, and 3 for strong. The proportion and intensity scores were then combined to obtain a weighted staining score for each case, ranging from 0 (0% of cells stained) to 3

(100% of cells stained). We defined the score < 1.5 as low GLUT5 staining and > 1.5 as high GLUT5 staining.

### **Serum alanine transaminase (ALT) and aspartate transaminase (AST) measurement**

We measured the concentrations of serum alanine transaminase (ALT) and aspartate transaminase (AST) using ALT and AST assay kits (Nanjing Jiancheng Bioengineering Institute). The substrate was mixed with standards and samples respectively. The mixture was incubated at 37°C for 30 minutes. Then DNPH was added to terminate the reaction. Rufous product, which was linearly correlated to ALT and AST levels, would be generated after adding NaOH. The signal of rufous product was recorded with the absorbance at 505 nm. The concentrations of ALT and AST were then determined by the standard curve.

### **Analysis of the public TCGA RNA-Seq and microarray datasets**

TCGA datasets and GEO datasets including GSE10072 and GSE75037 were downloaded from The Cancer Genome Atlas (<https://cancergenome.nih.gov/>) and the NCBI Gene Expression Omnibus (<http://www.ncbi.nlm.nih.gov/geo/>) respectively. TCGA dataset were normalized using FPKM-UQ algorithm. FPKM method was to normalize an expression value by taking into account each protein-coding gene length and the number of reads mappable to all protein-coding genes. FPKM-UQ method was to normalize raw read count in which gene expression values, in FPKM, by dividing the 75th percentile value. GSE10072 dataset was normalized using Robust Multichip Average method 5. GSE75037 dataset was processed with the MBCB algorithm which is a background-correction and summarization method, then quantile-normalized and log<sub>2</sub>-transformed.

### **Supplementary references:**

1. Li, X., et al. 2016. A splicing switch from ketohexokinase-C to ketohexokinase-A drives hepatocellular carcinoma formation. *Nat Cell Biol* 18:561-571.
2. Yu, G., et al. 2015. PKM2 regulates neural invasion of and predicts poor prognosis for human hilar cholangiocarcinoma. *Mol Cancer* 14:193.

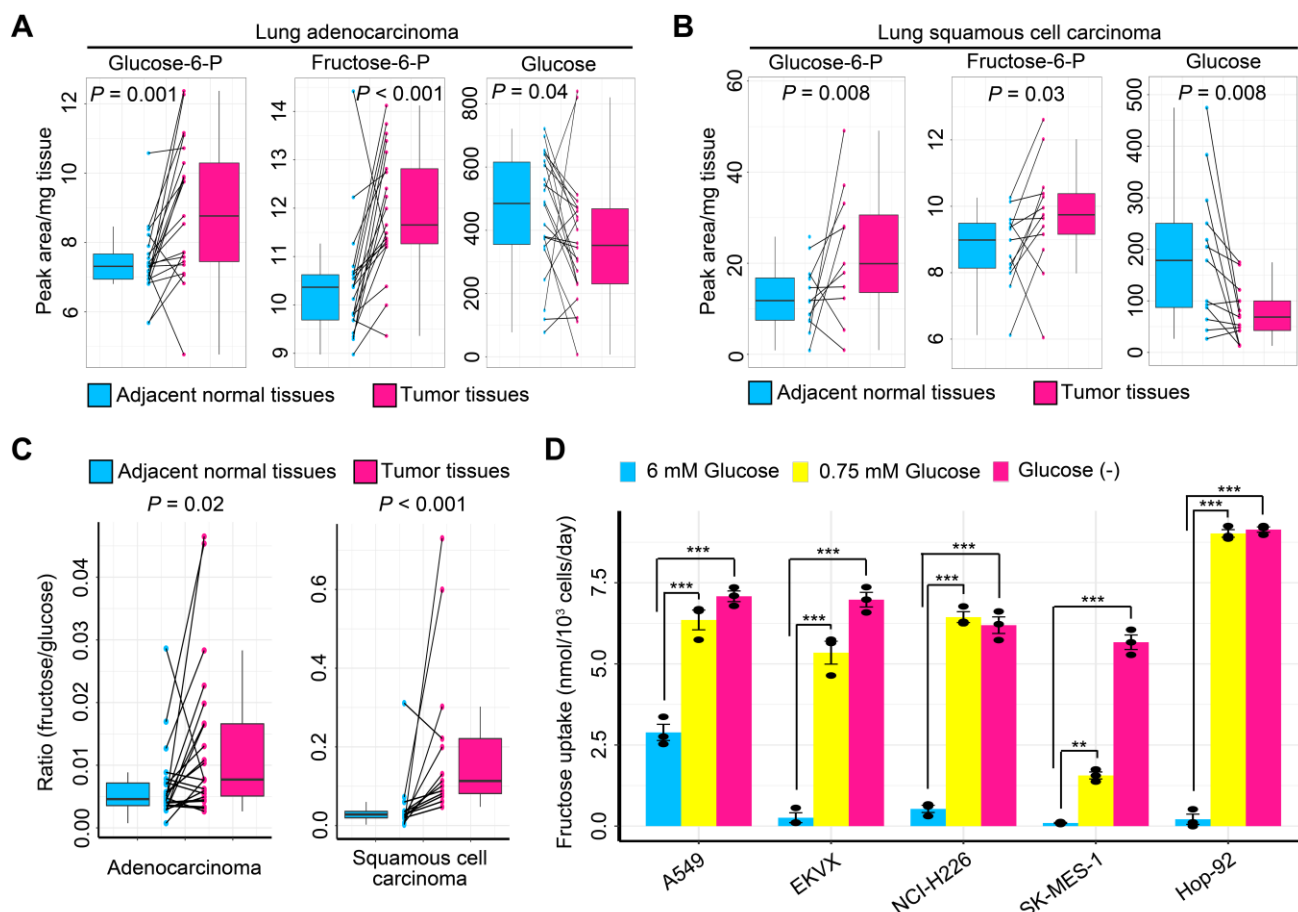

**Supplemental Figure 1. High glycolytic activity in lung cancer tissues of patients and increased fructose uptake by lung cancer cells under glucose-limiting conditions.**

(A and B) Concentrations of glycolytic metabolites and glucose between paired adjacent normal lung tissues and tumor tissues from patients with lung adenocarcinoma ( $n = 22$ ) (A) or lung squamous cell carcinoma ( $n = 13$ ) (B). Glucose-6-P, glucose-6-phosphate; Fructose-6-P, fructose-6-phosphate. The midline represented the median of the data, with the upper and lower limits of the box being the third and first quartile. Additionally, the whiskers of the boxplot extended up to 1.5 times of the interquartile range from the top or bottom of the box.  $P$  values were computed using 2-tailed Wilcoxon rank-sum test. (C) Ratio of fructose and glucose between paired adjacent normal lung tissues and tumor tissues from patients with lung adenocarcinoma ( $n = 22$ ) or lung squamous cell carcinoma ( $n = 13$ ). The midline represented the median of the data, with the upper and lower limits of the box being the third and first quartile. Additionally, the whiskers of the boxplot extended up to 1.5 times of the interquartile range from the top or bottom of the box.  $P$  values were computed using 2-tailed Wilcoxon rank-sum test. (D) Fructose uptake by LC cells under conditions of distinct

1 glucose levels. Statistical analysis was conducted using one-way ANOVA test. For each cell  
2 line, after carrying out homogeneity of variance test to confirm equal variance among  
3 subgroups, *P* values were acquired from Post Hoc test using LSD algorithm. Cumulative data  
4 are shown; *n* = 3. Error bars represent mean  $\pm$  SEM. \*\*\* *P* < 0.001, 2-tailed Student's *t* test.

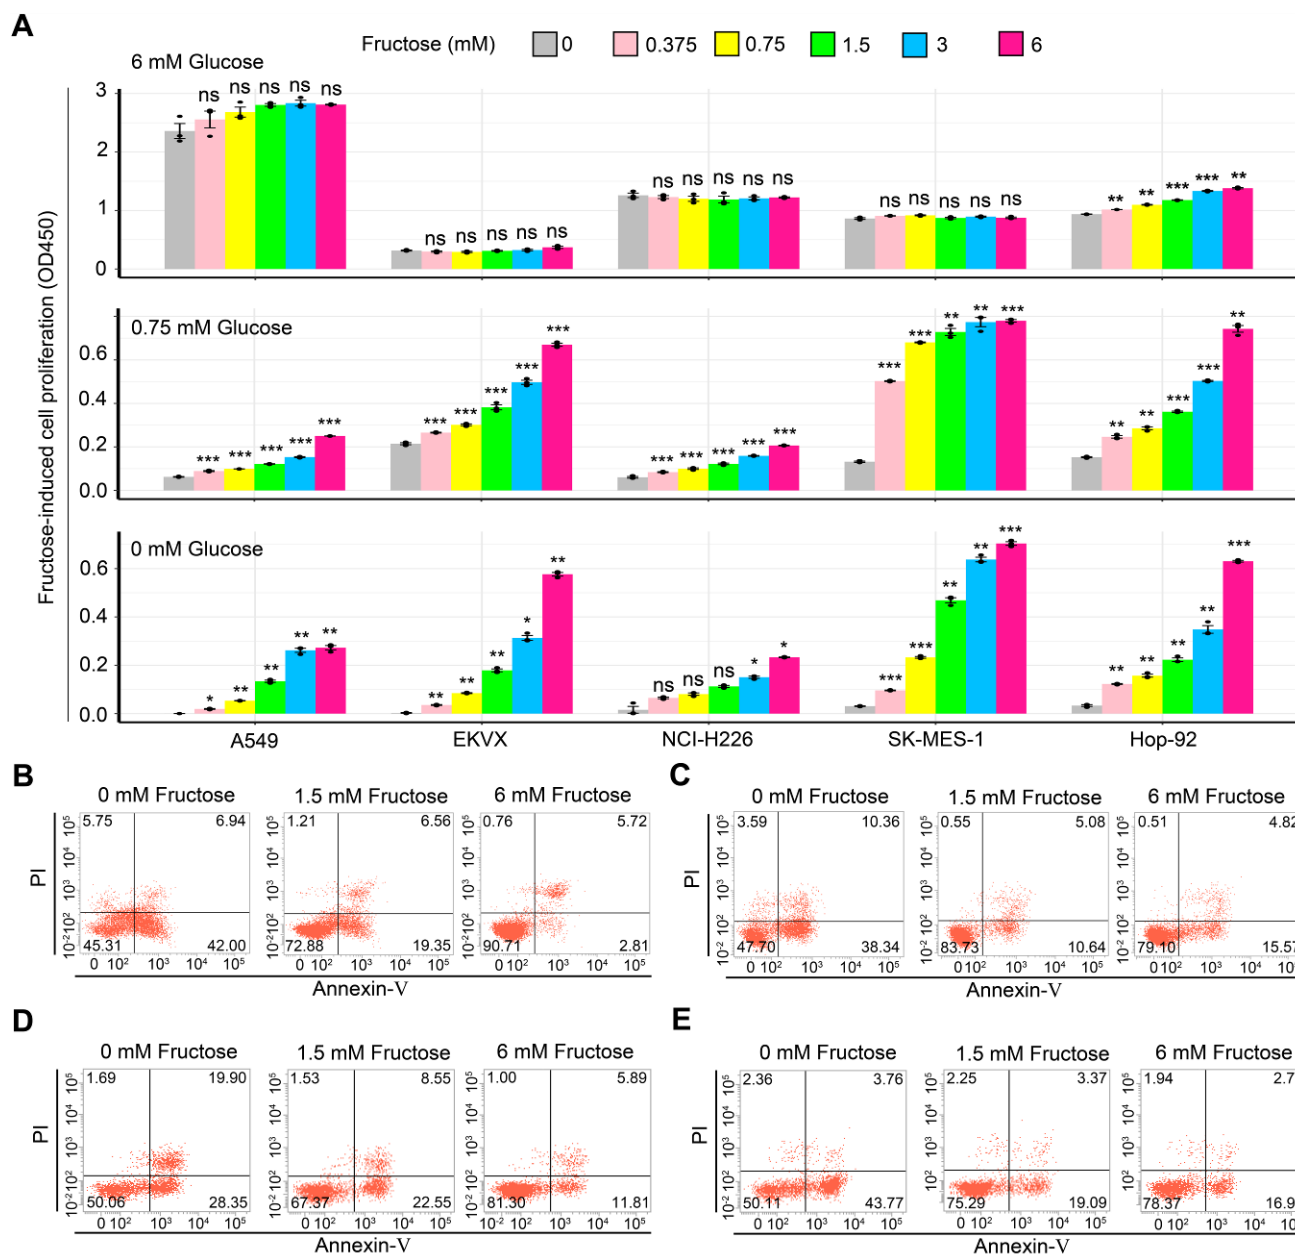

**Supplemental Figure 2. Lung cancer cells divert to utilize fructose to promote cell proliferation and cell survival when glucose is deficient or deprived.**

(A) Fructose-induced lung cancer cell proliferation under conditions of different glucose levels. Cells were cultured in the medium for 72 hours. Statistical analysis was conducted using one-way ANOVA test. For each glucose condition, *P* values were calculated by comparison with the cell proliferation in 0 mM fructose. Under condition of glucose deprivation, due to the unequal variances among subgroups for A549, EKVX, NCI-H226, SK-MES-1 and Hop-92 as shown by the results of homogeneity of variance test, *P* values were acquired from Post Hoc test using Dunnett's T3 algorithm. Under condition of 0.75 mM glucose, due to the equal variances among subgroups for A549, EKVX and NCI-H226 as

1 demonstrated by the results of homogeneity of variance test,  $P$  values were obtained from  
2 Post Hoc test using LSD algorism. Under condition of 0.75 mM glucose, due to the unequal  
3 variances among subgroups for SK-MES-1 and Hop-92 as demonstrated by the results of  
4 homogeneity of variance test,  $P$  values were gained from Post Hoc test using Dunnett's T3  
5 algorism. Under condition of 6 mM glucose, due to the unequal variances among subgroups  
6 for A549 and Hop-92 as demonstrated by the results of homogeneity of variance test,  $P$   
7 values were obtained from Post Hoc test using Dunnett's T3 algorism. Under condition of 6  
8 mM glucose, due to the equal variances among subgroups for EKVX, NCI-H226 and  
9 SK-MES-1 as demonstrated by the results of homogeneity of variance test,  $P$  values were  
10 obtained from Post Hoc test using LSD algorism. Cumulative data are shown;  $n = 3$ . Error  
11 bars represent mean  $\pm$  SEM. \* $P < 0.05$ , \*\*  $P < 0.01$ , \*\*\*  $P < 0.001$ , 2-tailed test. **(B-E)** Cell  
12 apoptosis analysis of LC cell lines cultured in medium with no glucose and different  
13 concentrations of fructose. A549 **(B)**, EKVX **(C)**, NCI-H226 **(D)** and Hop-92 **(E)** cells were  
14 cultured for 72 hours, 72 hours, 18 hours and 96 hours respectively.

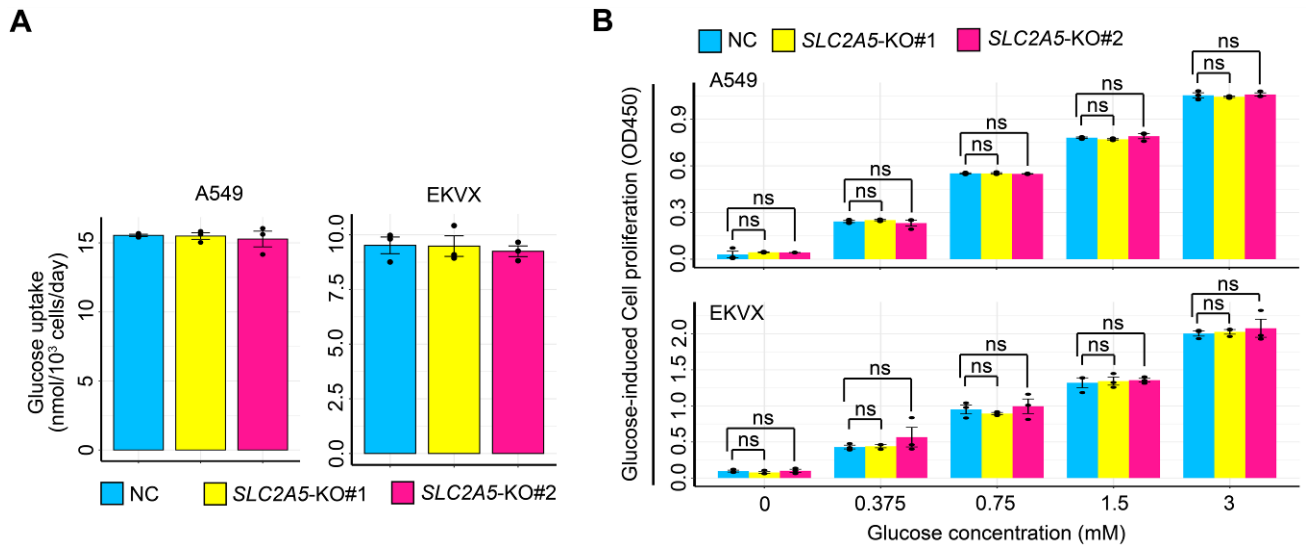

**Supplemental Figure 3. *SLC2A5* deletion does not influence glucose uptake and glucose-induced cell growth in lung cells *in vitro*.**

(A) Glucose uptake by A549 and EKVX cells with or without *SLC2A5* ablation. Cumulative data are shown; n = 3. (B) Glucose-induced cell proliferation of A549 and EKVX cells with or without *SLC2A5* ablation. Statistical analysis was conducted using one-way ANOVA test. For A549 cell growth, due to the unequal variances among subgroups for conditions of 0 mM glucose, 0.375 mM glucose and 1.5 mM glucose as demonstrated by the results of homogeneity of variance test, *P* values were gained from Post Hoc test using Dunnett's T3 algorithm. Additionally, due to the equal variances among subgroups for conditions of 0.75 mM glucose and 3 mM glucose as demonstrated by the results of homogeneity of variance test, *P* values were gained from Post Hoc test using Dunnett's T3 algorithm. For EKVX cell growth, due to the unequal variances among subgroups for conditions of 0.375 mM glucose and 3 mM glucose as demonstrated by the results of homogeneity of variance test, *P* values were gained from Post Hoc test using Dunnett's T3 algorithm. In addition, due to the equal variances among subgroups for conditions of 0 mM glucose, 0.75 mM glucose and 1.5 mM glucose as demonstrated by the results of homogeneity of variance test, *P* values were gained from Post Hoc test using Dunnett's T3 algorithm. Cumulative data are shown; n = 3. NC, non-target control; KO, knockout. Error bars represent mean  $\pm$  SEM.

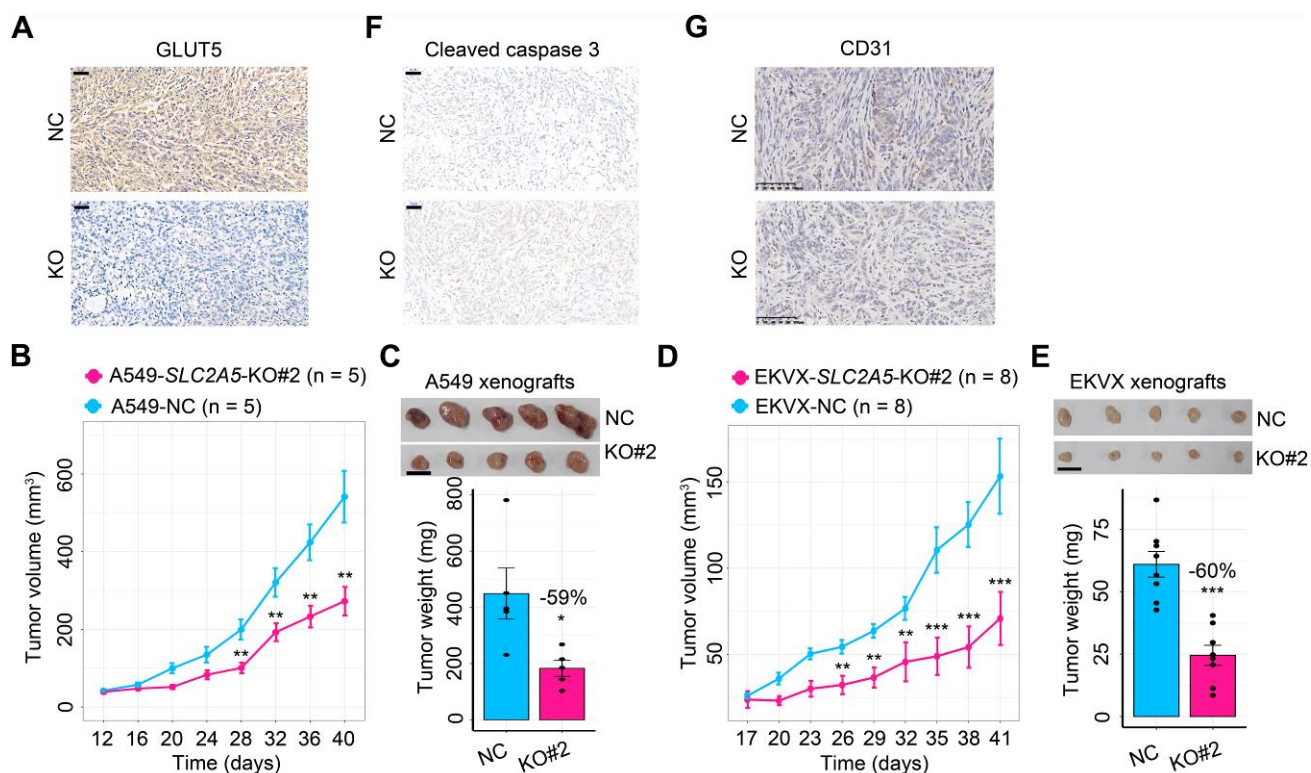

**Supplemental Figure 4. The influence of impaired fructose utilization by *SLC2A5* deletion on tumor xenograft growth of lung cancer cells.**

(A) Immunohistochemistry staining showing GLUT5 expression between control A549 tumor xenografts and A549 tumor xenografts with *SLC2A5* deletion. Scale bar, 50  $\mu$ m. (B) Subcutaneous tumor growth of A549-NC cells and A549- *SLC2A5*-KO#2 cells in nude mice. (C) Xenograft tumor images and tumor weight of A549-NC cells and A549- *SLC2A5*-KO#2 cells (n = 5 tumors for each group). Scale bar, 1 cm. (D) Subcutaneous tumor growth of EKVX-NC cells and EKVX- *SLC2A5*-KO#2 cells in nude mice. (E) Representative xenograft tumor images and tumor weight of EKVX-NC cells and EKVX- *SLC2A5*-KO#2 cells (n = 5 tumors for each group). Scale bar, 1 cm. (F) Immunohistochemistry staining revealing cleaved caspase 3 expression between control A549 tumor xenografts and A549 tumor xenografts with *SLC2A5* deletion. Scale bar, 50  $\mu$ m. (G) Immunohistochemistry staining displaying CD31 expression between control A549 tumor xenografts and A549 tumor xenografts with *SLC2A5* deletion. Scale bar, 50  $\mu$ m.

NC, non-target control; KO, knockout. Error bars represent mean  $\pm$  SEM. \*\*  $P < 0.01$ , \*\*\*  $P < 0.001$ , 2-tailed Student's t test.



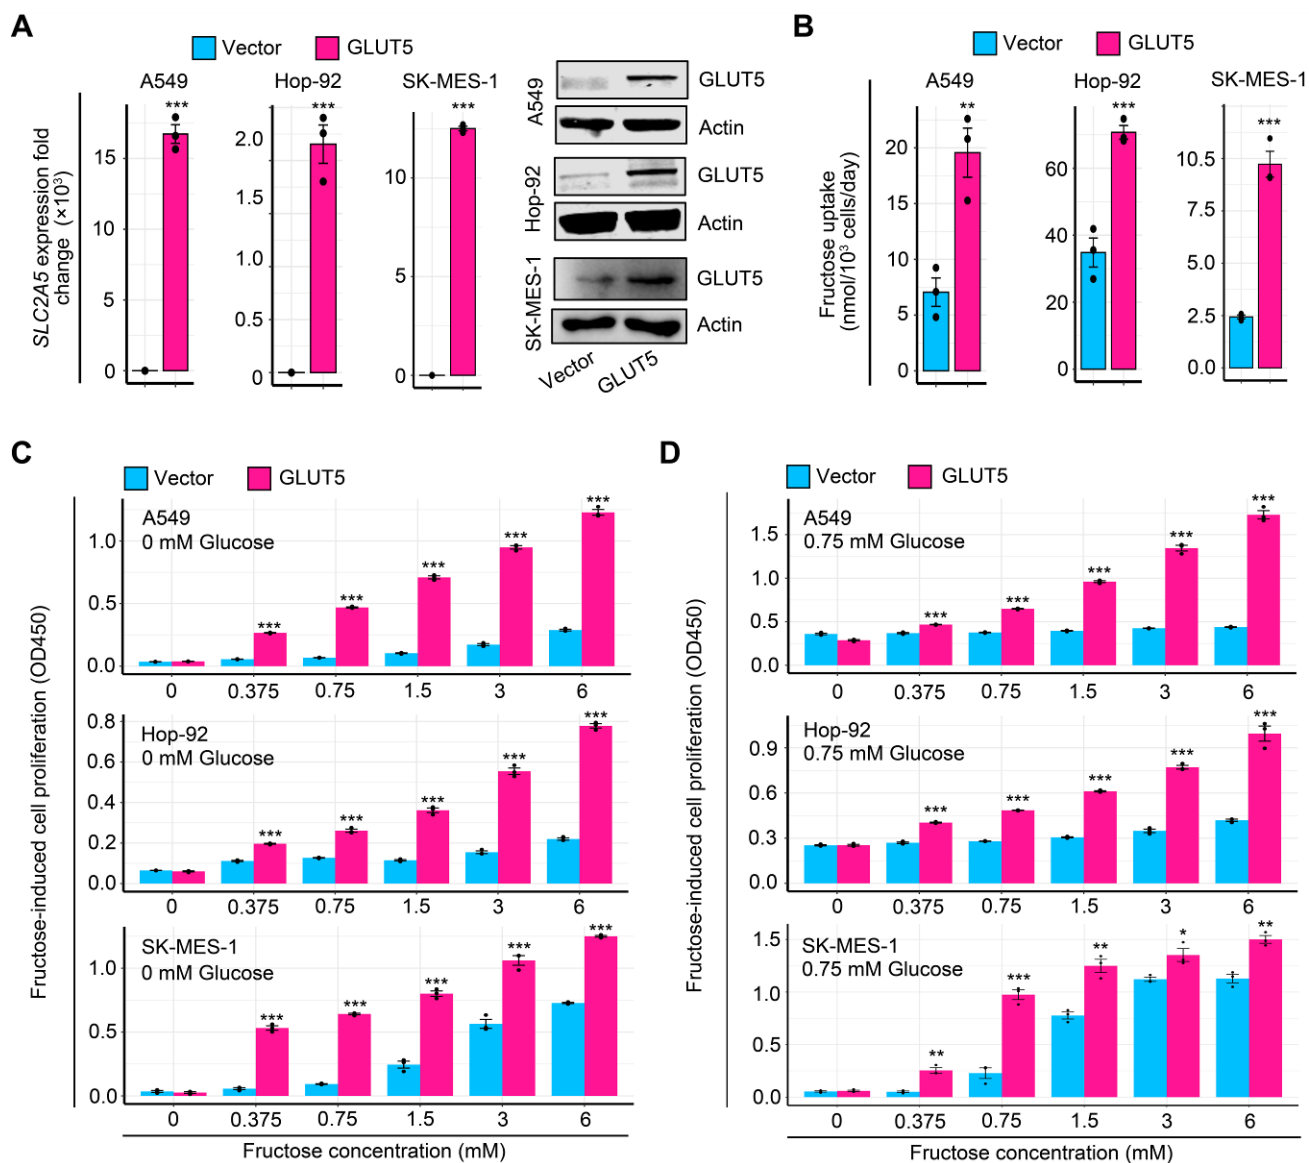

**Supplemental Figure 5. Impact of enhanced fructose utilization mediated by enforced GLUT5 expression on fructose uptake and cell proliferation *in vitro*.**

(A) Measurement of *SLC2A5* and GLUT5 expression in lung cancer cells transfected with the control MigR1 retrovirus or MigR1-GLUT5 retrovirus by q-PCR and Western blot respectively. Cumulative data are shown;  $n = 3$ . (B) Fructose uptake by lung cancer cells with or without ectopic GLUT5 expression. Cumulative data are shown;  $n = 3$ . (C) Fructose-induced cell proliferation of lung cancer cells with or without enforced GLUT5 expression under no glucose condition. For each fructose concentration,  $P$  values were obtained by comparison with the proliferation of cells transfected with control vector. Cumulative data are shown;  $n = 3$ . (D) Influence of enhanced fructose utilization mediated by ectopic GLUT5 expression on lung cancer cell proliferation under low glucose (0.75 mM)

1 condition. For each fructose concentration,  $P$  values were obtained by comparison with the  
2 proliferation of cells transfected with control vector. Cumulative data are shown;  $n = 3$ .  
3 Error bars represent mean  $\pm$  SEM. \* $P < 0.05$ , \*\*  $P < 0.01$ , \*\*\*  $P < 0.001$ , 2-tailed Student's  $t$   
4 test.

5

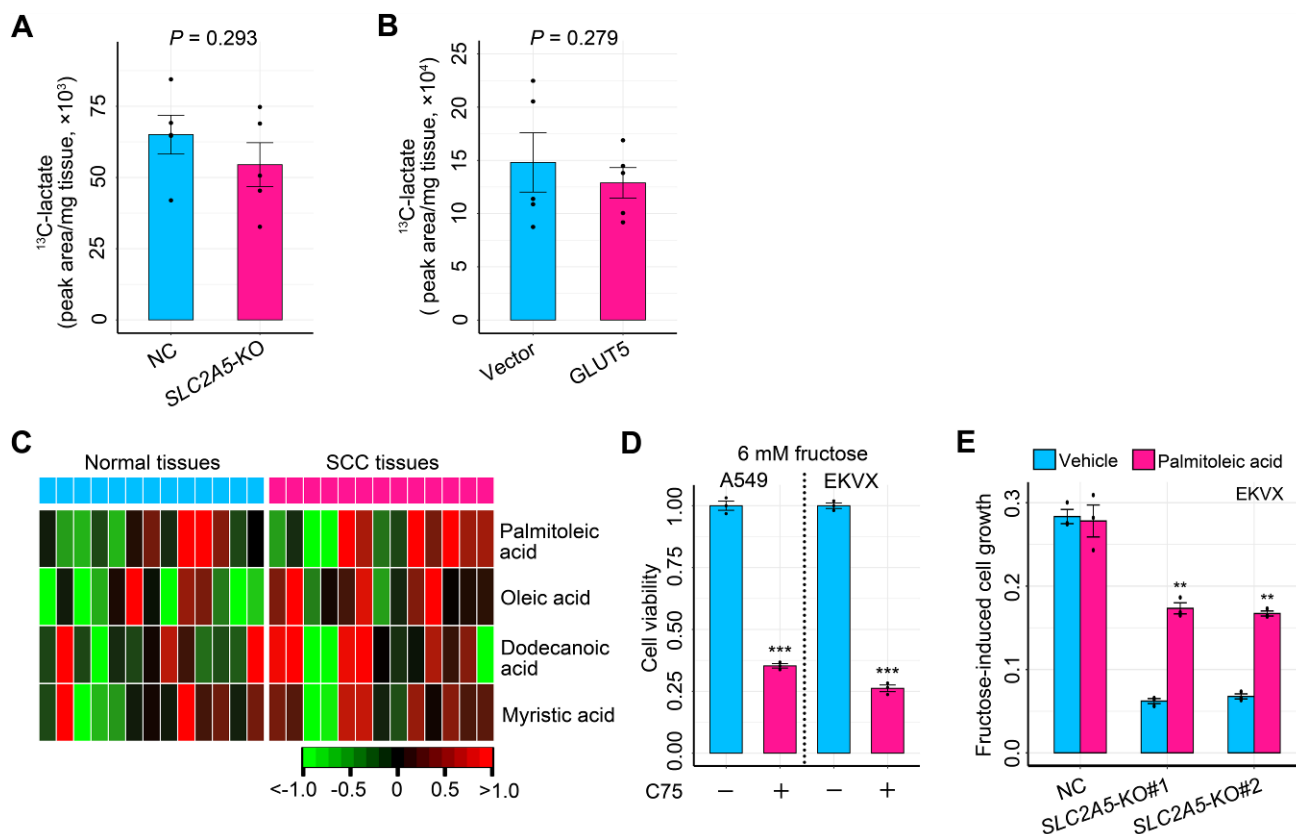

**Supplemental Figure 6. Fatty acid concentrations between adjacent normal and tumorous lung tissues of patients with squamous cell carcinoma, and the importance of fatty acid synthesis for fructose-induced lung cancer cell growth.**

(A) Production of  $^{13}\text{C}$ -lactate derived from  $^{13}\text{C}$ -fructose in A549 xenografts with or without *SLC2A5* ablation ( $n = 5$  tumors for each group). 2-tailed Student's *t* test. (B) Production of  $^{13}\text{C}$ -lactate derived from  $^{13}\text{C}$ -fructose in A549 xenografts with or without GLUT5 overexpression ( $n = 5$  tumors for each group). 2-tailed Student's *t* test. (C) Heatmap showing fatty acid concentrations between adjacent normal and tumorous lung tissues of patients with squamous cell carcinoma ( $n = 13$ ). (D) Impact of the FASN inhibitor C75 on fructose-induced cell growth of A549 and EKVX. Cells were grown in the medium containing 6 mM fructose with or without C75 (100  $\mu\text{M}$ ). Cumulative data are shown;  $n = 3$ . (E) Palmitoleic acid supplement restored the *in vitro* growth of EKVX cells with *SLC2A5* ablation. Cells were cultured in complete medium containing 6mM fructose for 72 hours. The concentration for palmitoleic acid was 50  $\mu\text{M}$ . Cumulative data are shown;  $n = 3$ .

NC, non-target control; KO, knockout. Error bars represent mean  $\pm$  SEM. \*\*  $P < 0.01$ , \*\*\*  $P < 0.001$ , 2-tailed Student's *t* test.

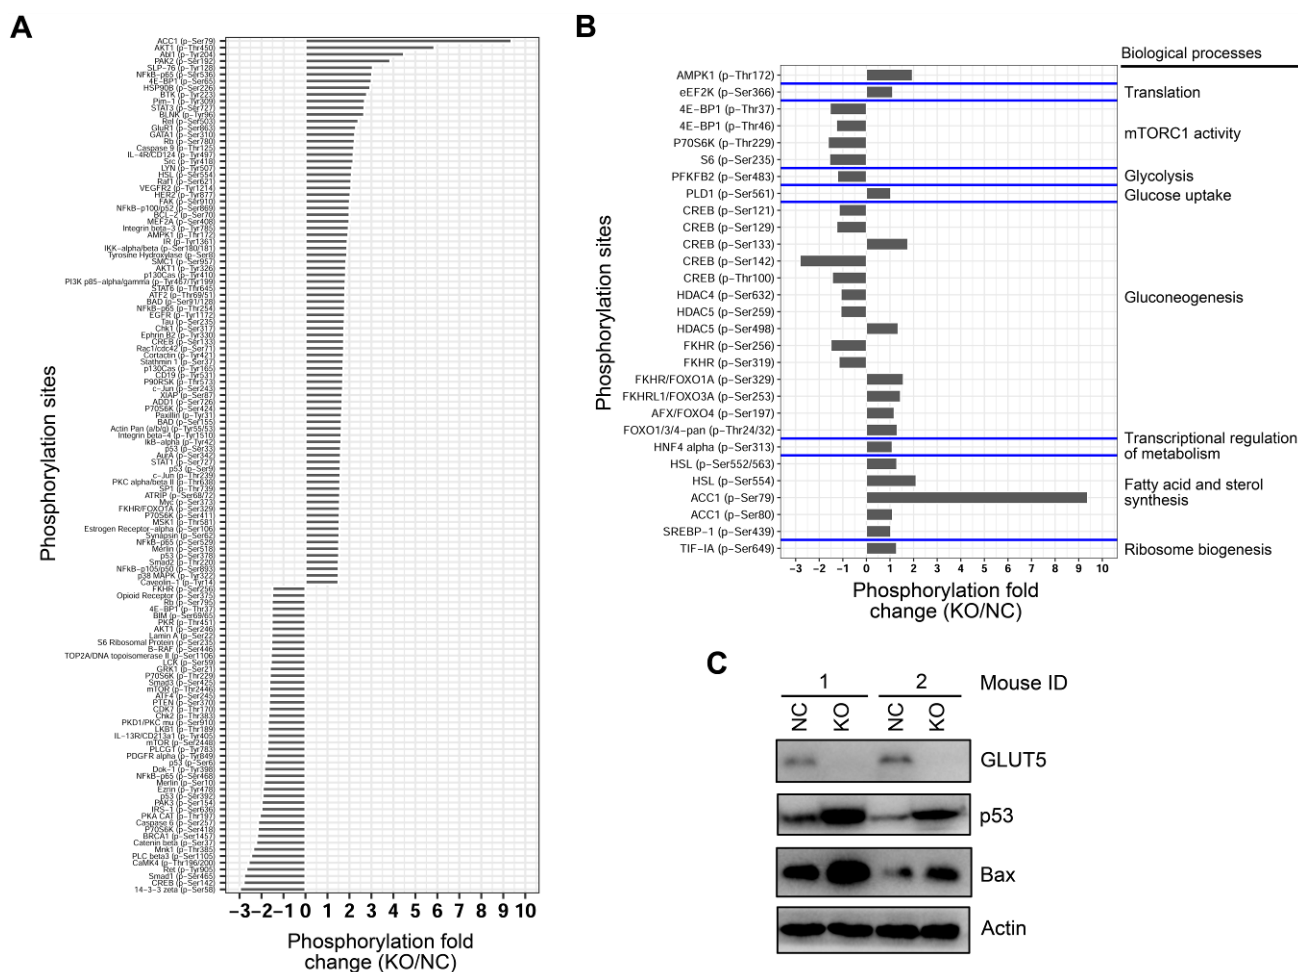

**Supplemental Figure 7. Phospho-protein profiling between A549 tumor xenografts with *SLC2A5* deletion and those without *SLC2A5* deletion.**

(A) Phospho-proteomics assay of A549 tumor xenografts with or without *SLC2A5* ablation. Proteins with phosphorylation levels increased by 50% or decreased by 50% in A549-*SLC2A5*-KO tumor xenografts relative to A549-NC tumor xenografts were presented. (B) Phosphorylation alteration of downstream targets of AMPK in A549-*SLC2A5*-KO tumor xenografts relative to A549-NC tumor xenografts. (C) Western blot showing the expression of p53 and Bax between A549 tumor xenografts with *SLC2A5* deletion and control A549 tumor xenografts.

NC, non-target control; KO, knockout.

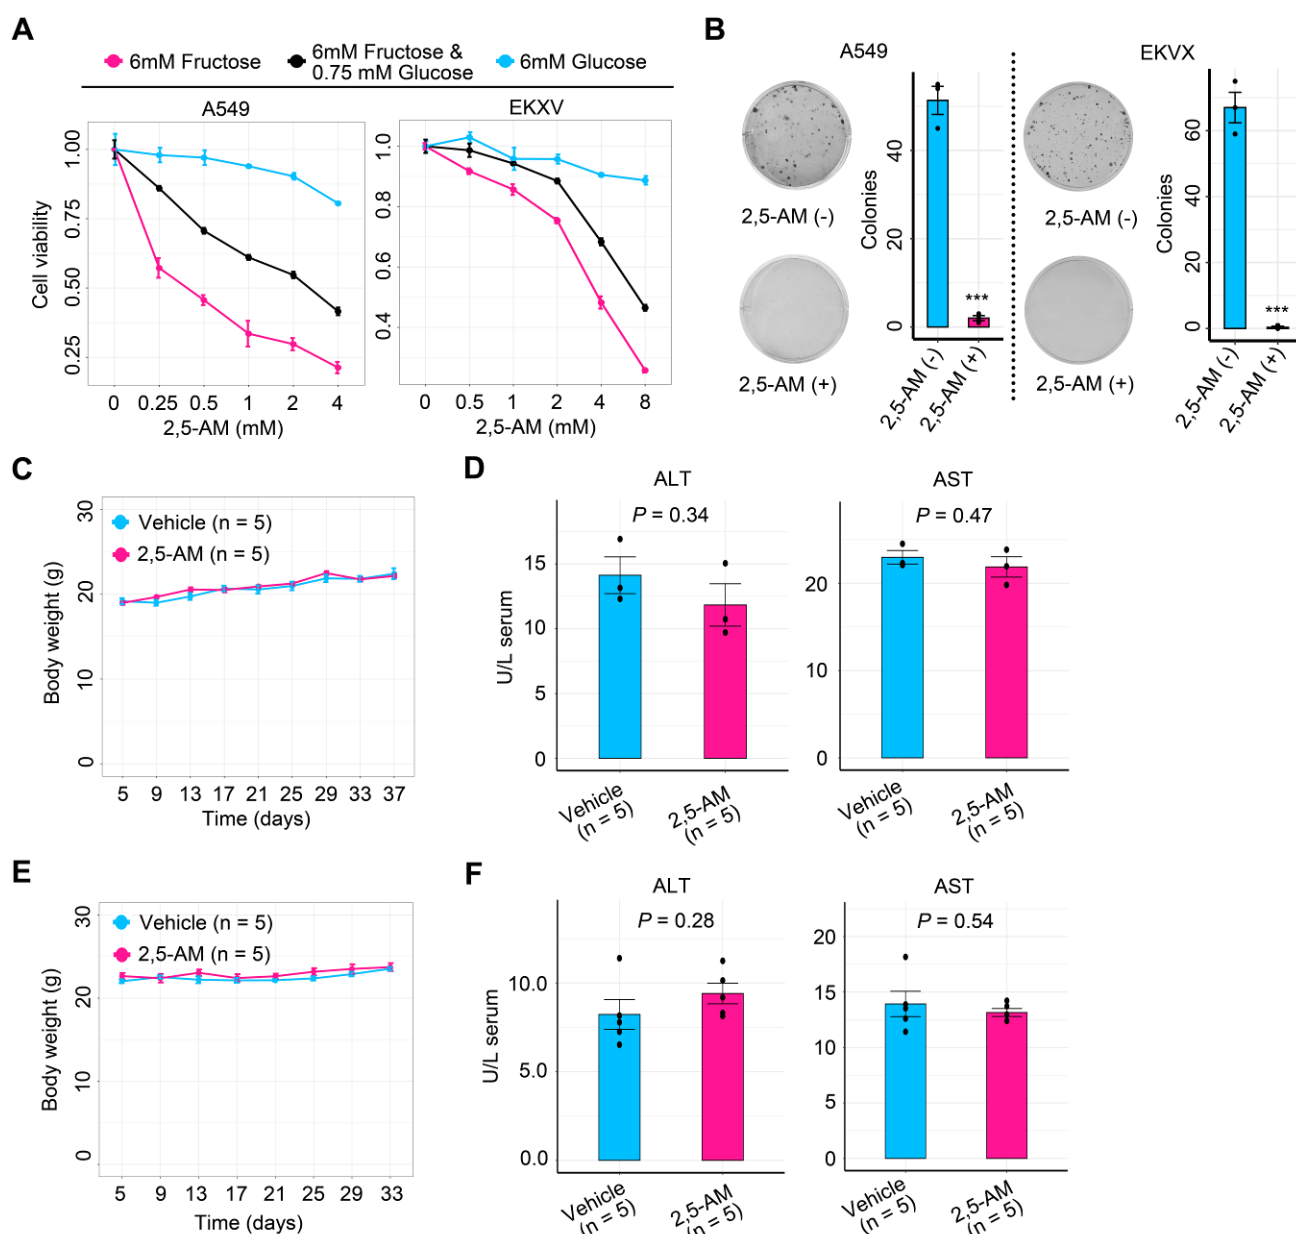

**Supplemental Figure 8. Pharmacological treatment using a GLUT5 inhibitor, 2,5-anhydro-D-mannitol (2,5-AM), restrains the neoplastic growth of lung cancer and exhibits negligible side effects.**

(A) Proliferation of lung cancer cells treated with 2,5-AM under distinct carbon source conditions. Cumulative data are shown;  $n = 3$ . (B) Colony growth of A549 and EKVX cells in medium containing 6 mM fructose with or without 2,5-AM (4 mM) treatment. Cumulative data are shown;  $n = 3$ . (C) Body weight curve of mice bearing A549 tumors treated with vehicle or 2,5-AM. (D) Blood alanine transaminase (ALT) and aspartate transaminase (AST) levels in mice bearing A549 tumors treated with vehicle or 2,5-AM ( $n = 5$  for each group). (E) Body weight curve of mice bearing EKVX tumors treated with vehicle or 2,5-AM. (F) Blood ALT

1 and AST levels in mice bearing EKVX tumors treated with vehicle or 2,5-AM (n = 5 for each  
2 group).

3 Error bars represent mean  $\pm$  SEM. *P* values were computed using 2-tailed Student's *t* test. \*\*\*

4 *P* < 0.001.

5

# 1 Supplemental Table 1. Key resources table

| REAGENT or RESOURCE                            | SOURCE                         | IDENTIFIER |
|------------------------------------------------|--------------------------------|------------|
| Chemicals, Peptides, and Recombinant Proteins  |                                |            |
| [U- <sup>13</sup> C6] -D-fructose              | Cambridge Isotope Laboratories | CLM-1553-1 |
| 2,5-Anhydro-D-mannitol                         | TRC                            | 649000     |
| Lipofectamine 3000                             | Thermo Fisher Scientific       | L3000008   |
| Hexadimithrine bromide                         | Sigma                          | H9268-5G   |
| D-Fructose                                     | Sigma                          | P3510-500G |
| D-Glucose                                      | Sigma                          | G7012-1KG  |
| Palmitoleic acid                               | Sigma                          | P9417      |
| Bovine serum albumin                           | Equitech-Bio                   | BAH66-0050 |
| Oligonucleotides                               |                                |            |
| CRISPR guide RNA for non-target (NT) control:  |                                |            |
| FWD: AAGAAGAATTGGGGATGATG                      | Addgene                        | N/A        |
| REV: CATCATCCCCAATTCTTCTT                      |                                |            |
| CRISPR guide RNA #1 for human <i>SLC2A5</i> :  |                                |            |
| FWD: CCCAGCCGCGCAGCGTCTGT                      | Addgene                        | N/A        |
| REV: ACAGACGCTGCGCGGCTGGG                      |                                |            |
| CRISPR guide RNA #2 for human <i>SLC2A5</i> :  |                                |            |
| FWD: CCCAGGCTGGCCGATCCTGC                      | Addgene                        | N/A        |
| REV: GCAGGATCGGCCAGCCTGGG                      |                                |            |
| CRISPR guide RNA #1 for human <i>FASN</i> :    |                                |            |
| FWD: CGACCCACCTCCGTCCACGA                      | Addgene                        | N/A        |
| REV: CGACCCACCTCCGTCCACGA                      |                                |            |
| CRISPR guide RNA #2 for human <i>FASN</i> :    |                                |            |
| FWD: TACGCCACCATCCTGAACGC                      | Addgene                        | N/A        |
| REV: GCGTTCAGGATGGTGGCGTA                      |                                |            |
| CRISPR guide RNA #1 for Human <i>HIF1A</i> :   |                                |            |
| FWD: CCTCACACGCAAATAGCTGA                      | Addgene                        | N/A        |
| REV: TCAGCTATTGCGTGTGAGG                       |                                |            |
| CRISPR guide RNA #2 for Human <i>HIF1A</i> :   |                                |            |
| FWD: TGTTTACAGTTTGAACAAAC                      | Addgene                        | N/A        |
| REV: GTTAGTTCAAACGTAAACA                       |                                |            |
| Primers for full-length human <i>SLC2A5</i> :  |                                |            |
| FWD: CATGCCATGGAGCAACAGGATCAGAGC               | This study                     | N/A        |
| REV: CATGCCATGGACTGTTCCGAAGTGACAGG             |                                |            |
| Primers for q-PCR, see Supplemental table 3    | This study                     | N/A        |
| Critical Commercial Assays                     |                                |            |
| FITC Annexin V Apoptosis Detection Kit I (RUO) | BD                             | 556547     |
| Cell Counting Kit-8(CCK-8)                     | Dojindo                        | CK04       |
| High Sensitivity Fructose Assay Kit            | Sigma                          | MAK180-1KT |

|                                               |                                             |                                                                     |
|-----------------------------------------------|---------------------------------------------|---------------------------------------------------------------------|
| Glucose (HK) Assay Kit                        | Sigma                                       | GAHK20-1KT                                                          |
| SYBR® Premix Ex Taq™ (Tli RNase H Plus)       | Takara                                      | RR42WR                                                              |
| Alanine aminotransferase Assay Kit            | Nanjing Jiancheng Bioengineering Institute  | C009-2                                                              |
| Aspartate aminotransferase Assay Kit          | Nanjing Jiancheng Bioengineering Institute  | C010-2                                                              |
| Experimental Models: Cell Lines               |                                             |                                                                     |
| A549                                          | NCI                                         | N/A                                                                 |
| Hop-92                                        | NCI                                         | N/A                                                                 |
| EKVX                                          | NCI                                         | N/A                                                                 |
| NCI-H226                                      | NCI                                         | N/A                                                                 |
| SK-MES-1                                      | Stem Cell Bank, Chinese Academy of Sciences | SCSP-5010                                                           |
| 293T                                          | ATCC                                        | CRL-3216                                                            |
| Experimental Models: Organisms/Strains        |                                             |                                                                     |
| Mouse: BALB/c-nude                            | Shanghai SLAC Laboratory Animal Co.,Ltd     | N/A                                                                 |
| Recombinant DNA                               |                                             |                                                                     |
| MigR1 vector                                  | Addgene                                     | 27490                                                               |
| MigR1-human GLUT5 vector                      | This study                                  | N/A                                                                 |
| VSVG packaging vector                         | Addgene                                     | 14888                                                               |
| Gag/pol packaging vector                      | Addgene                                     | 14887                                                               |
| Lenti-cas9-BSD vector                         | Addgene                                     | 52962                                                               |
| psPAX2 packaging vector                       | Addgene                                     | 12260                                                               |
| pMD2.G packaging vector                       | Addgene                                     | 12259                                                               |
| Lenti-Guide-puro-guide RNA for NT control     | Addgene                                     | N/A                                                                 |
| Lenti-Guide-puro-guide RNA #1 for human GLUT5 | Addgene                                     | N/A                                                                 |
| Lenti-Guide-puro-guide RNA #2 for human GLUT5 | Addgene                                     | N/A                                                                 |
| Lenti-Guide-puro-guide RNA #1 for human FASN  | Addgene                                     | N/A                                                                 |
| Lenti-Guide-puro-guide RNA #2 for human FASN  | Addgene                                     | N/A                                                                 |
| Software and Algorithms                       |                                             |                                                                     |
| R language                                    | Open source                                 | <a href="https://www.r-project.org/">https://www.r-project.org/</a> |
| ImageJ software                               | Open source                                 | <a href="https://imagej.nih.gov/ij/">https://imagej.nih.gov/ij/</a> |
| CRISPR Guide RNA database                     |                                             |                                                                     |
| Others                                        |                                             |                                                                     |
| Dialyzed, fetal bovine serum                  | Thermo Fisher Scientific                    | 26400044                                                            |
| DMEM, no Glucose                              | Thermo Fisher Scientific                    | 11966025                                                            |



1 **Supplemental Table 2. Mouse diet formula.**

2

| Ingredient          | Weight (g) |
|---------------------|------------|
| Casein, 30 Mesh     | 200        |
| L-Cystine           | 3          |
| Corn Starch         | 397        |
| Maltodextrin        | 132        |
| Sucrose             | 100        |
| Cellulose           | 50         |
| Soybean Oil         | 70         |
| t-Butylhydroquinone | 0.014      |
| Mineral Mix S10022G | 35         |
| Vitamin Mix V10037  | 10         |
| Choline Bitartrate  | 2.5        |
| Total               | 1000       |

3

4

1 **Supplemental Table 3. Primer sequence for q-PCR.**

| Gene          | Species | NCBI Locus ID | Forward primer sequence (5'→3') | Reverse primer sequence (5'→3') |
|---------------|---------|---------------|---------------------------------|---------------------------------|
| <i>SLC2A5</i> | Human   | NM_003039     | TCTGTAACCGTGTCCATGTTTC          | CATTAAGATCGCAGGCACGATA          |
| <i>ACTIN</i>  | Human   | NM_001101.3   | CACTCTTCCAGCCTTCCTTC            | GTACAGGTCTTTGCGGATGT            |

2

Figure2E

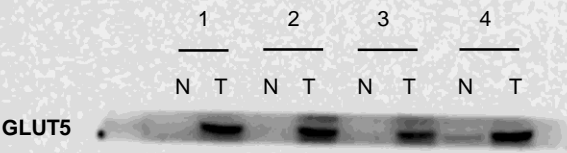

Figure2E

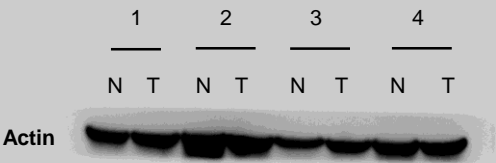

Figure2F

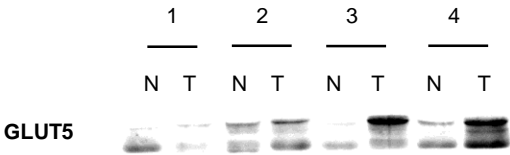

Figure2F

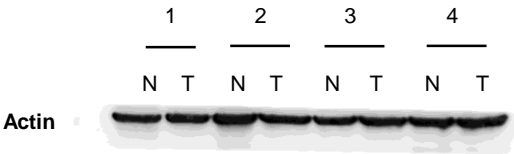

Figure4A

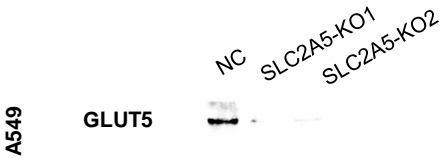

Figure4A

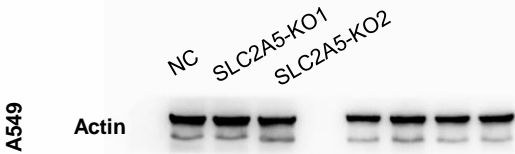

Figure4A

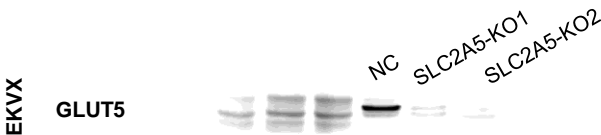

Figure4A

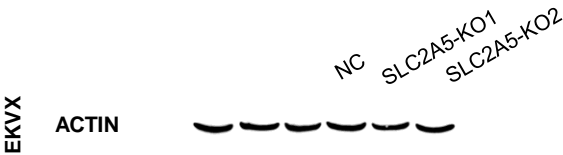

Figure5A

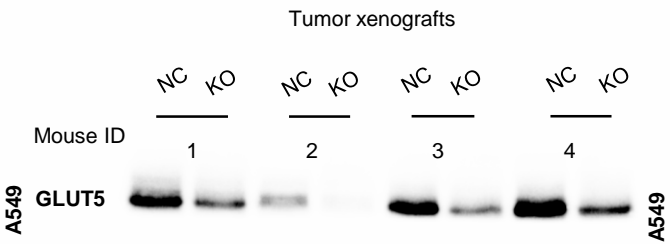

Figure5A

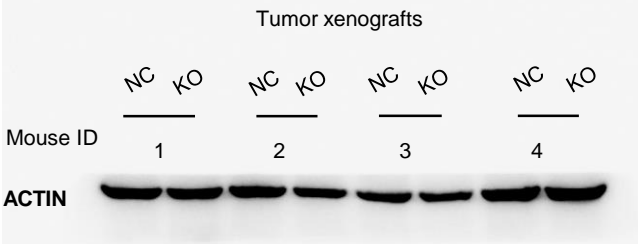

Figure5A

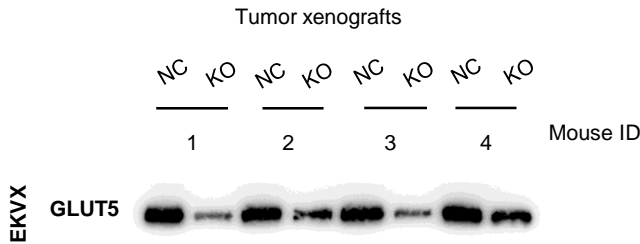

Figure5A

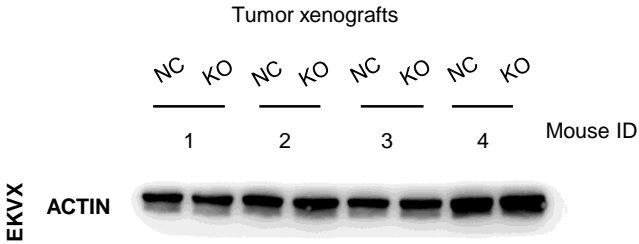

Figure5G

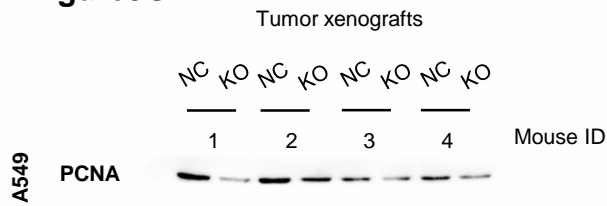

Figure5G

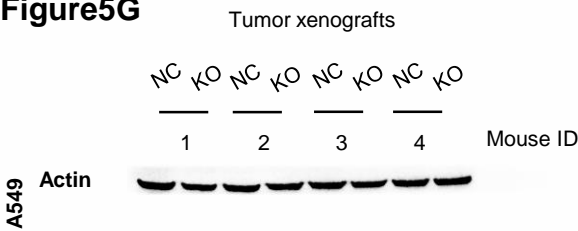

Figure5G

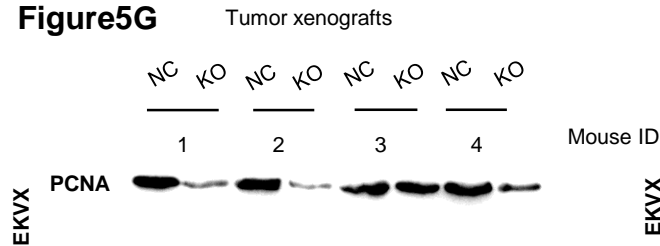

Figure5G

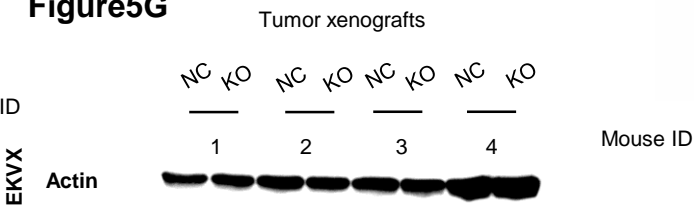

Figure6A

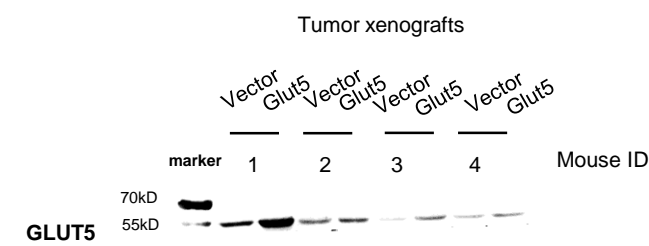

Figure6A

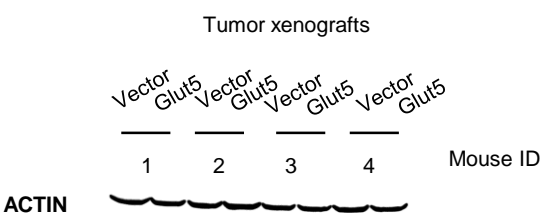

Figure6E

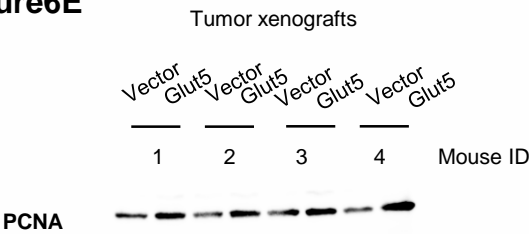

Figure6E

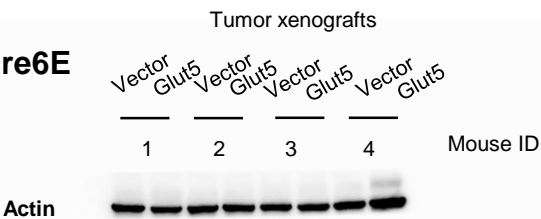

Figure8A

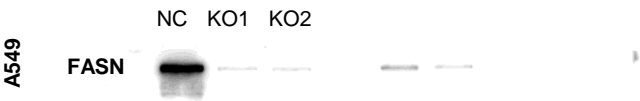

Figure8A

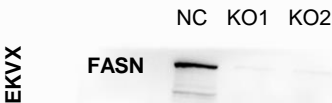

Figure8A

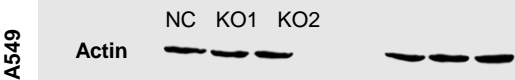

Figure8A

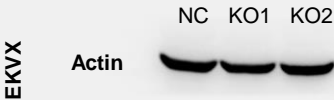

Figure9B

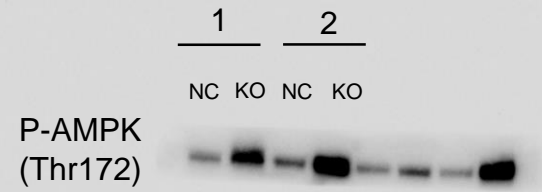

Figure9B

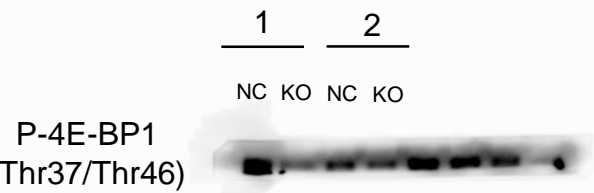

Figure9B

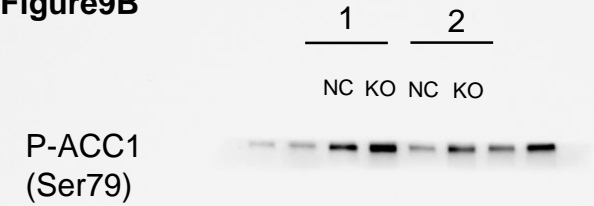

Figure9B

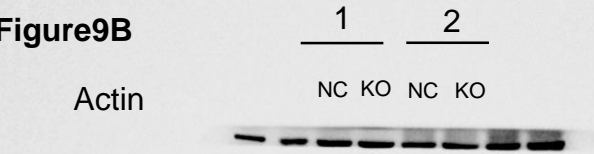

Figure9D

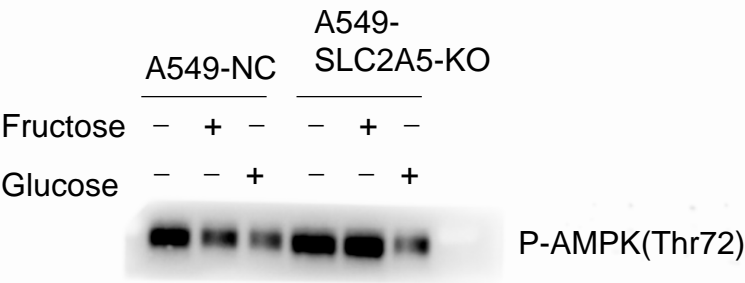

Figure9D

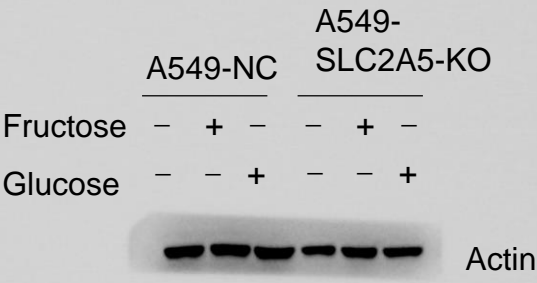

Figure9E

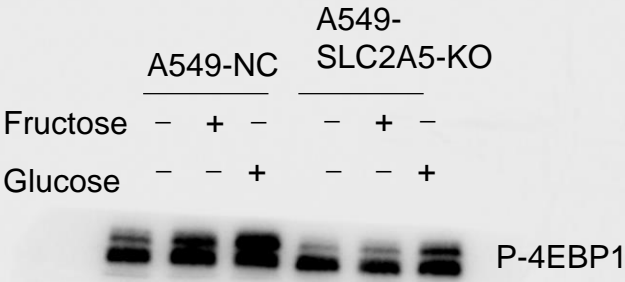

Figure9E

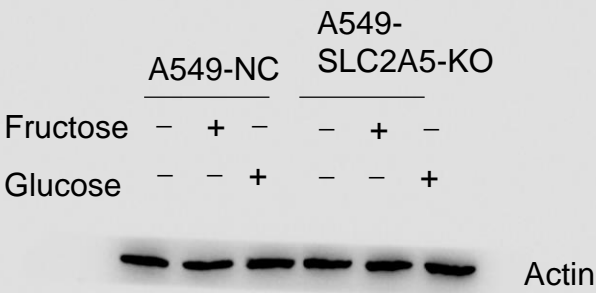



Figure9F

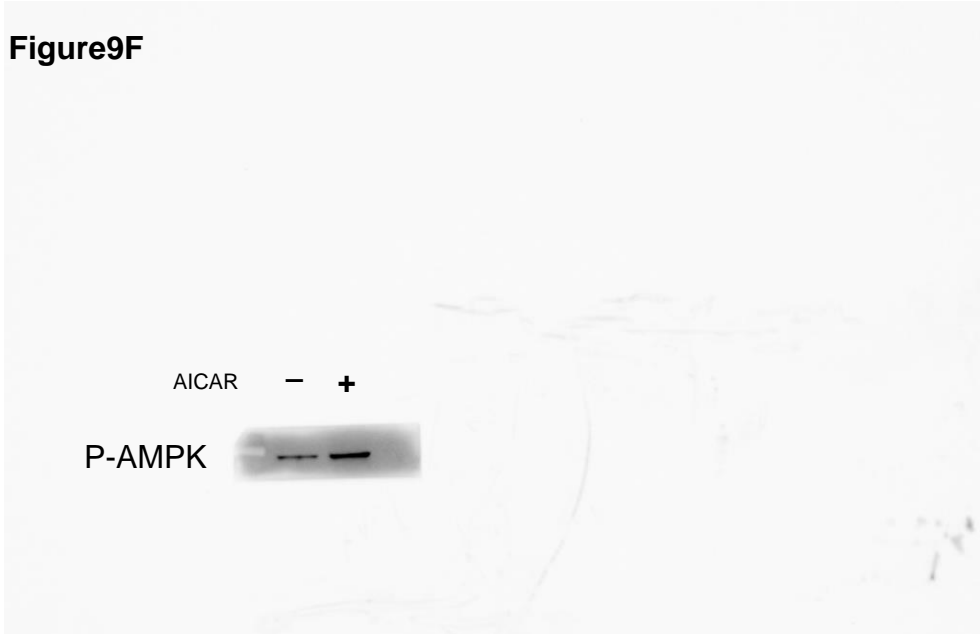

Figure9F

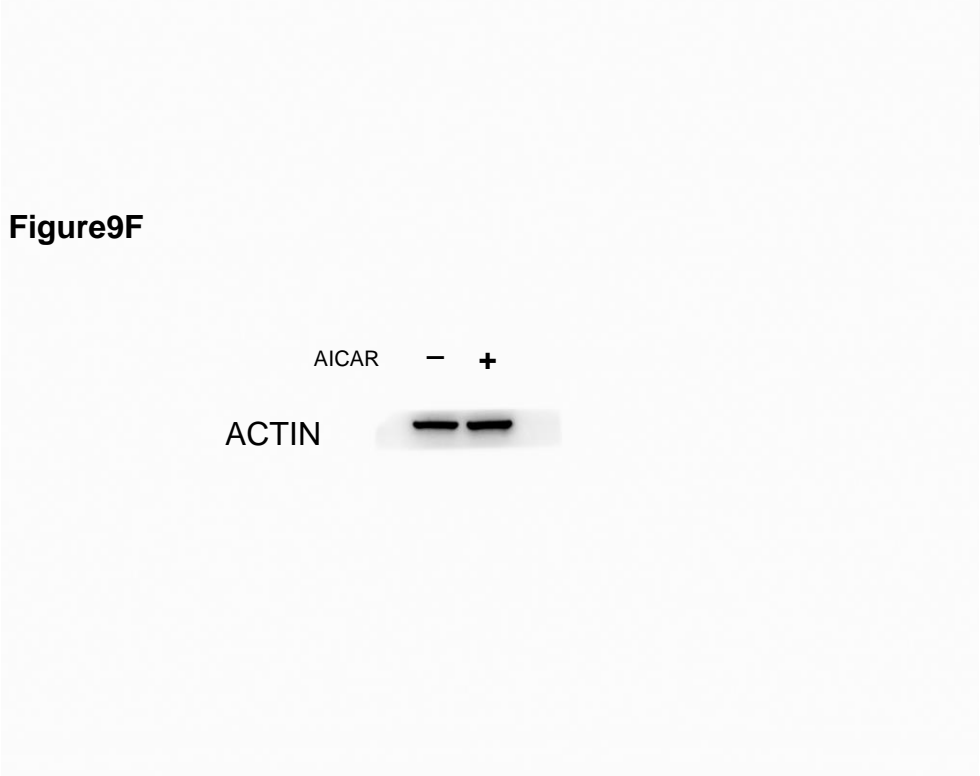

Figure9F

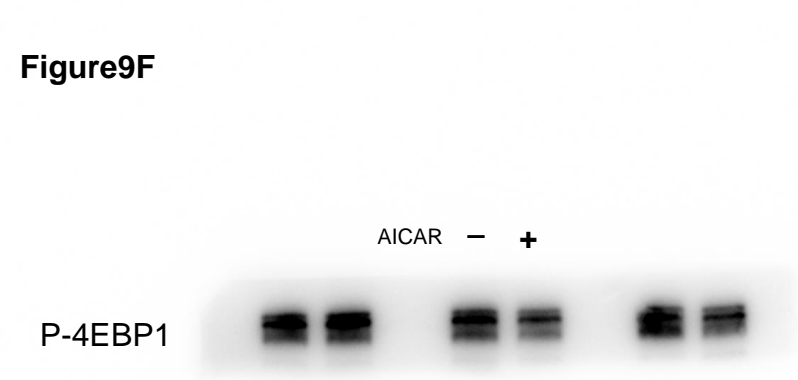

Figure9F

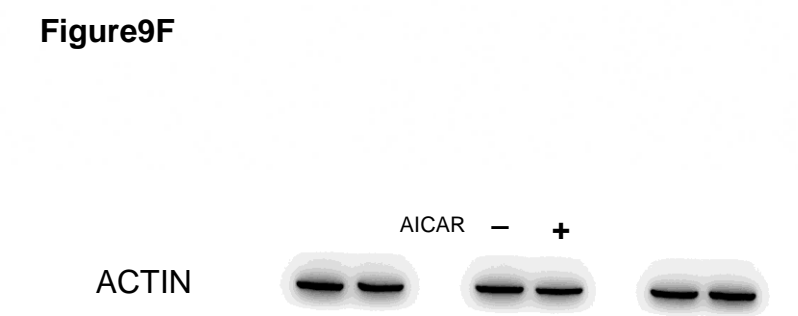

Supplemental Figure 5A

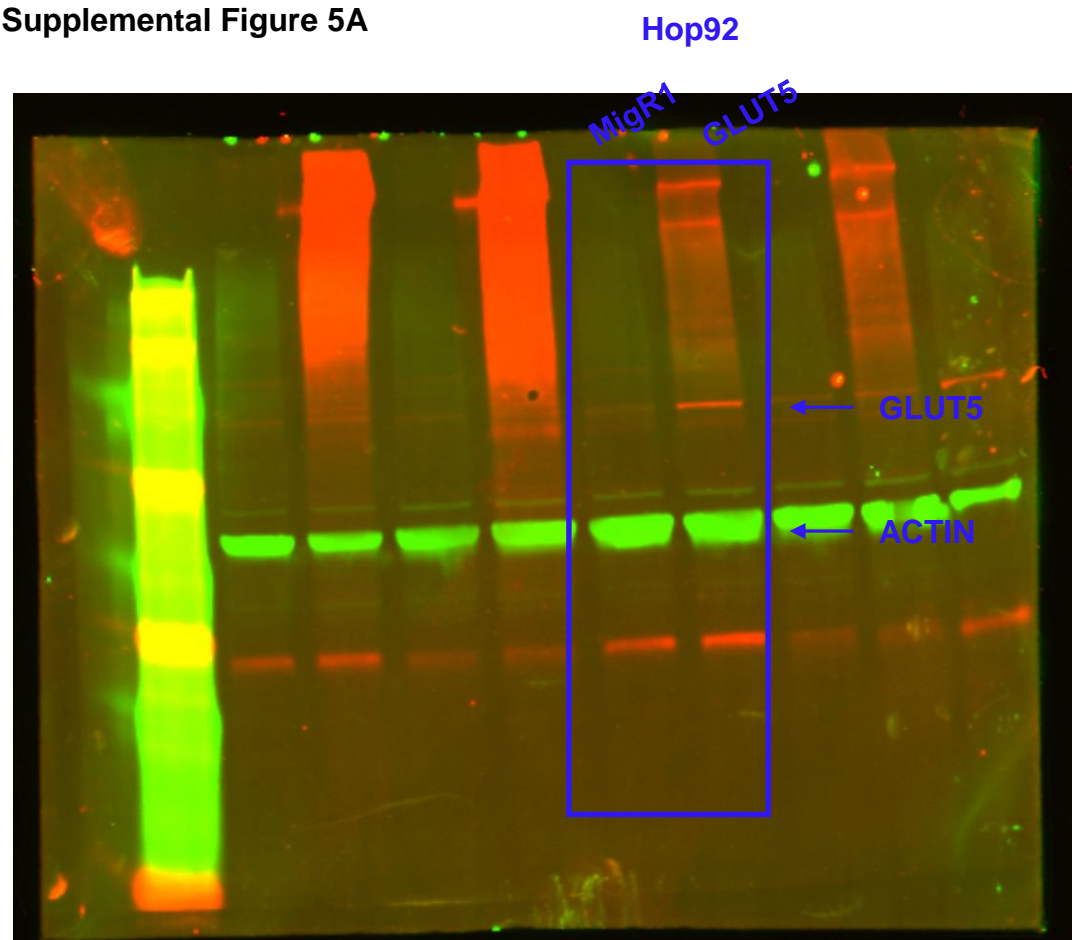

Supplemental Figure 5A

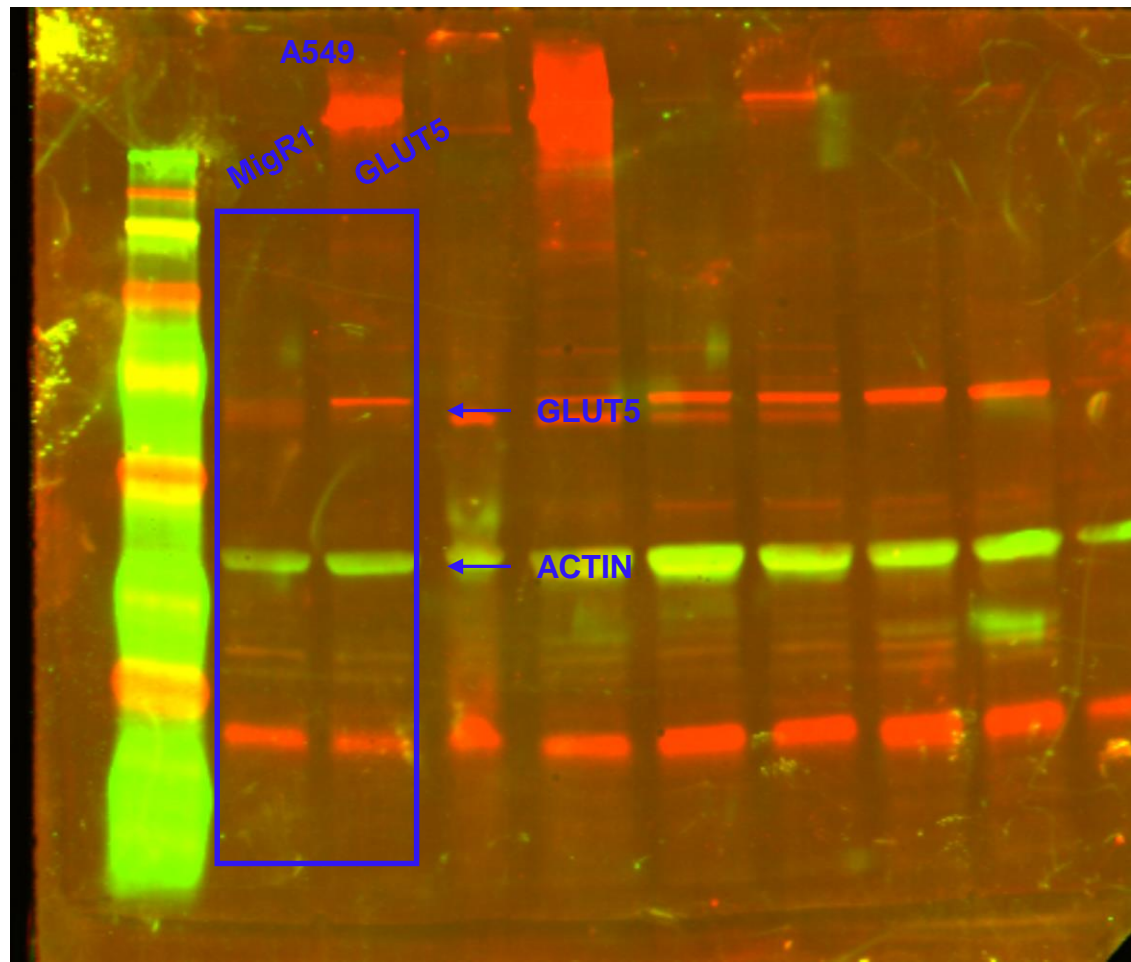

Supplemental Figure 5A

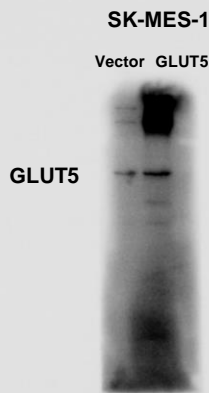

Supplemental Figure 5A

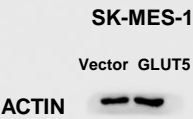

Supplemental Figure 7C

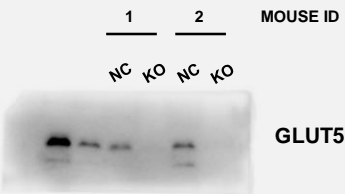

Supplemental Figure 7C

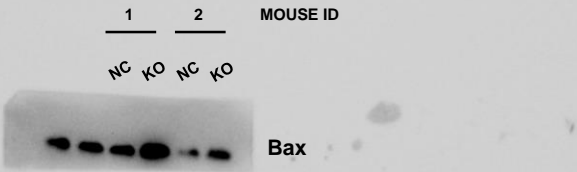

Supplemental Figure 7C

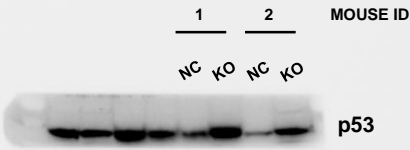

Supplemental Figure 7C

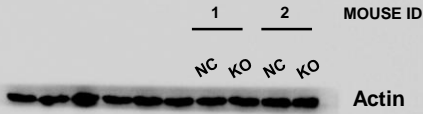

Supplement: sd1 [file 1]
